## Modeling the dynamics of SARS-CoV-2 immunity waning, antigenic drifting, and population serology patterns

By James S. Koopman & Carl P. Simon: University of Michigan. October 7, 2020

The authors have withdrawn this manuscript for the following reason. Upon following their strategy for making valid decisions, they found that making the escape from immunity steps in the model more biologically realistic, the model behavior changed so significantly that the first version of the model was no longer valid. Specifically, the old version misdirected drifting toward instead of away from immunity. The authors intend to upload a new version of their manuscript in the coming weeks. Therefore, the authors do not wish this work to be cited as reference for the project. If you have any questions, please contact the corresponding author.
